# Supplementary material for: High Prevalence of Ancylostoma ceylanicum Hookworm Infections in Humans, Cambodia, 2012
Source: PubMed Central journal article supplement (PMC4036766; doi:10.3201/eid2006.131770), 2014-06
Supplement: 13-1770-Techapp-s1.pdf [file 13-1770-Techapp-s1.pdf]

# High Prevalence of *Ancylostoma ceylanicum* Hookworm Infections in Humans, Cambodia, 2012

## Technical Appendix

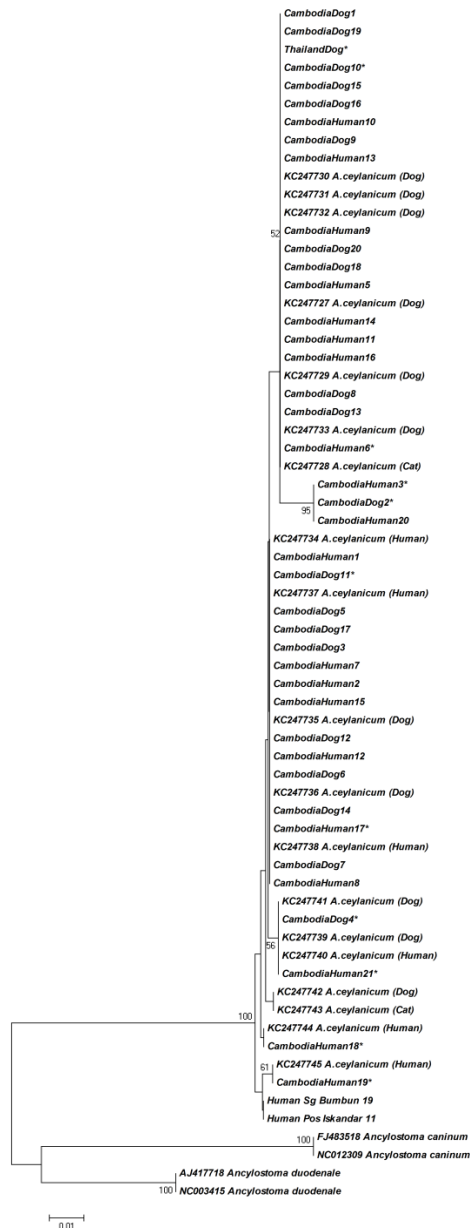

Technical Appendix Figure. Phylogenetic tree obtained from neighbor-joining analysis of *cox-1* gene amplicons (377 bp) of *Ancylostoma ceylanicum* hookworms sourced from 21 humans and 27 dogs in Cambodia together with reference isolates from Malaysia and Thailand sourced from GenBank (KC247727–45).
